# Supplementary material
Source: publisher figshare collection journal article supplement (https://aacr.figshare.com/articles/dataset/_/23828299)
Supplement: Supplementary file 1 [file 41811409]

**Supplemental Table S2. Functional synNotch circuits.**

| Tumor model                                | "Priming" (SynNotch) antigen | CAR Antigen        | Reference |
|--------------------------------------------|------------------------------|--------------------|-----------|
| Breast cancer (MDA-MB-231)                 | EPCAM OR B7-H3               | ROR1               | (51)      |
| Glioblastoma multiforme (U87 and GBM6 PDX) | EGFRviii                     | EphA2/IL12RA2      | (162)     |
| Neuroblastoma (NB9464D)                    | GD2                          | B7H3               | (163)     |
| Hepatocellular carcinoma (SK-Hep1)         | GPC3                         | CD147              | (164)     |
| Mesothelioma (M28)                         | ALPPL2                       | MCAM OR Mesothelin | (52)      |
| Ovarian cancer (SK-OV3)                    | ALPPL2                       | HER2               | (52)      |
